# Supplementary material
Source: PubMed Central journal article supplement (PMC2939475)
Supplement: supp_110.032961_Additional-1.pdf [file supp_110.032961_Additional-1.pdf]

**Additional Figure 1:** HPLC chromatogram showing the elution of parathion and its metabolites, paraoxon and PNP. (A) Metabolite peaks from standards. The blue plot represents the wavelength of 310 nm that is optimal for recognition and quantification of PNP. The black plot represents the wavelength of 275 nm that is optimal for recognition and quantification of paraoxon and parathion. Standards eluted at: parathion 16.41 min; paraoxon 5.79 min; PNP 4.38 min. (B) Metabolite peaks from a representative sample. The black plot represents the wavelength of 310 nm that is optimal for recognition and quantification of PNP. The red plot represents the wavelength of 275 nm that is optimal for recognition and quantification of paraoxon and parathion.

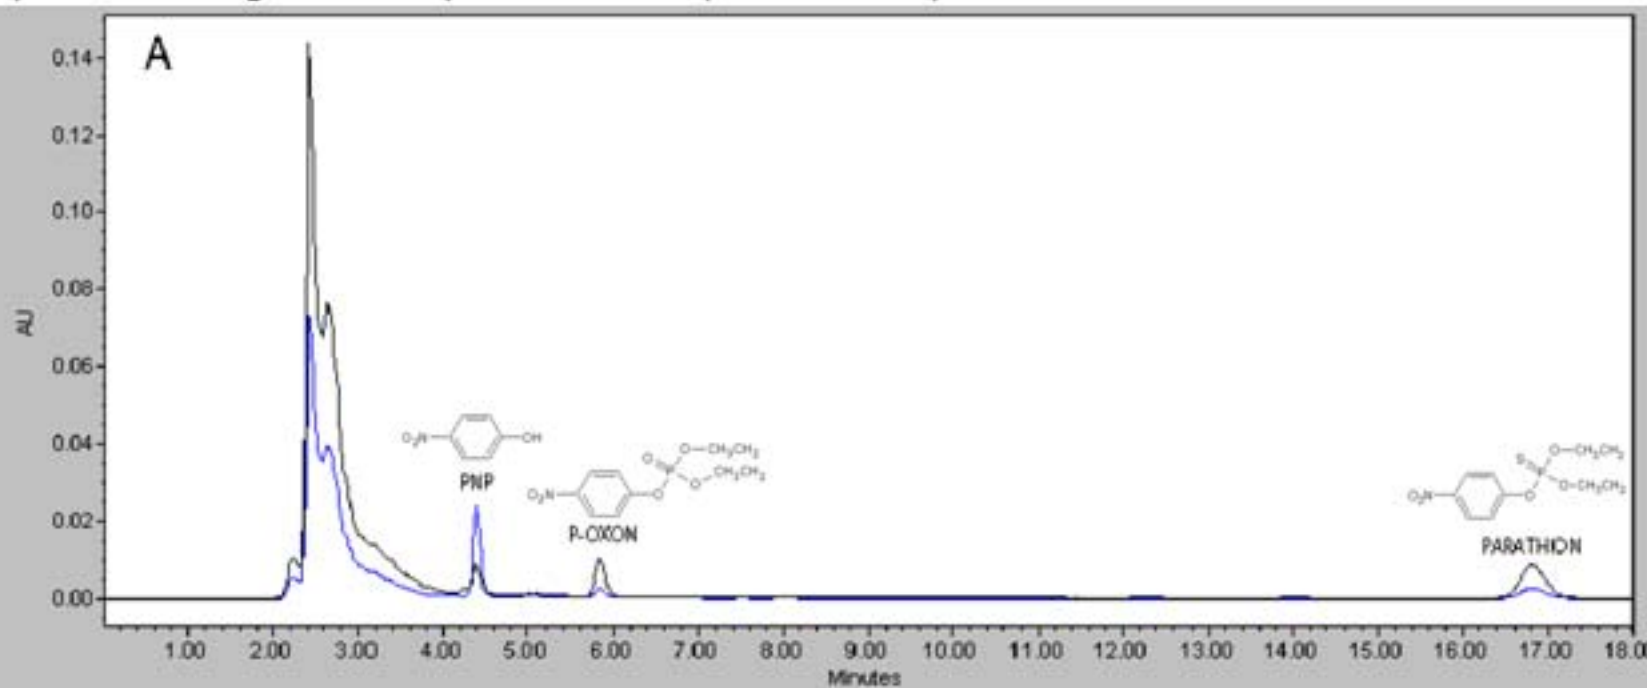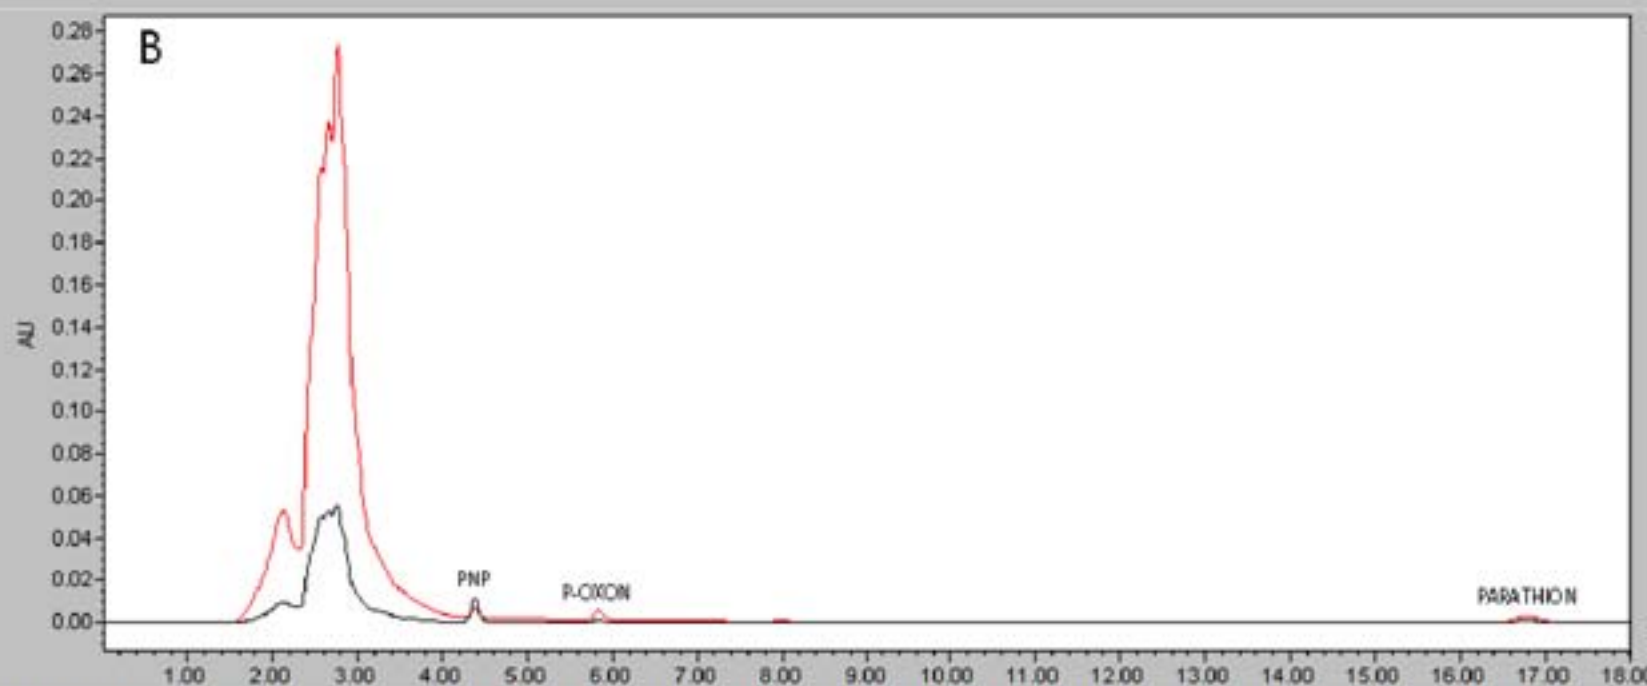

CAR-null mice are sensitive to the toxic effects of parathion: Association with reduced CYP-mediated parathion metabolism. Linda C Mota, Juan P. Hernandez, and William S. Baldwin. *Drug Metabolism and Disposition*
